# Supplementary material for: Effects of Wee1 inhibitor adavosertib on patient-derived high-grade serous ovarian cancer cells are multiple and independent of homologous recombination status
Source: Front Oncol. 2022 Aug 23;12:954430. doi: 10.3389/fonc.2022.954430 (PMC9445195; doi:10.3389/fonc.2022.954430)
Supplement: Supplementary file 15 [file Table_10.xlsx]

## Sheet: S10
Table S10: Functional HR-test results. HR-scores.
Cell line	HR score %	HR status
M048i	40	HRP
OC002	28	HRD
OVCAR8	7	HRD
CAOV3	57	HRP
